# Supplementary material for: A significant mechanism of stratospheric O 3 intrusion to atmospheric environment: a case study of North China Plain
Source: Copernicus journal article supplement (doi:10.5194/egusphere-2024-268), 2024-02-28
Supplement: Supplementary file 1 [file egusphere-2024-268-supplement.pdf]

# Supplement Material

for

## A significant mechanism of stratospheric O<sub>3</sub> intrusion to atmospheric environment: a case study of North China Plain

Yuehan Luo<sup>1</sup>, Tianliang Zhao<sup>1,\*</sup>, Kai Meng<sup>2</sup>, Jun Hu<sup>3</sup>, Qingjian Yang<sup>1</sup>, Yongqing Bai<sup>4</sup>, Kai Yang<sup>1</sup>, Weikang Fu<sup>1</sup>, Chenghao Tan<sup>5,6</sup>, Yifan Zhang<sup>7</sup>, Yanzhe Zhang<sup>8</sup>, Zhikuan Li<sup>1</sup>

<sup>1</sup>Collaborative Innovation Center on Forecast and Evaluation of Meteorological Disasters, Key Laboratory of Aerosol-Cloud-Precipitation of China Meteorological Administration, Nanjing University of Information Science and Technology, Nanjing, 210044, China

<sup>2</sup>Key Laboratory of Meteorology and Ecological Environment of Hebei Province, Hebei Provincial Institute of Meteorological Sciences, Shijiahuang, 050021, China

<sup>3</sup>Fujian Academy of Environmental Sciences, Fuzhou, 350011, China

<sup>4</sup>Hubei Key Laboratory for Heavy Rain Monitoring and Warning Research, Institute of Heavy Rain, China Meteorological Administration, Wuhan, 430205, China

<sup>5</sup>State Key Laboratory of Organic Geochemistry, Guangzhou Institute of Geochemistry, Chinese Academy of Sciences, Guangzhou 510640, Guangdong, China

<sup>6</sup>University of Chinese Academy of Sciences, Beijing 100049, China

<sup>7</sup>Xuchang Meteorological Service, Xuchang, 450003, China

<sup>8</sup>Ningxia Air Traffic Management Sub-bureau of CAAC, Yinchuan, 750009, China

Correspondence to: Tianliang Zhao (tlzhao@nuist.edu.cn)

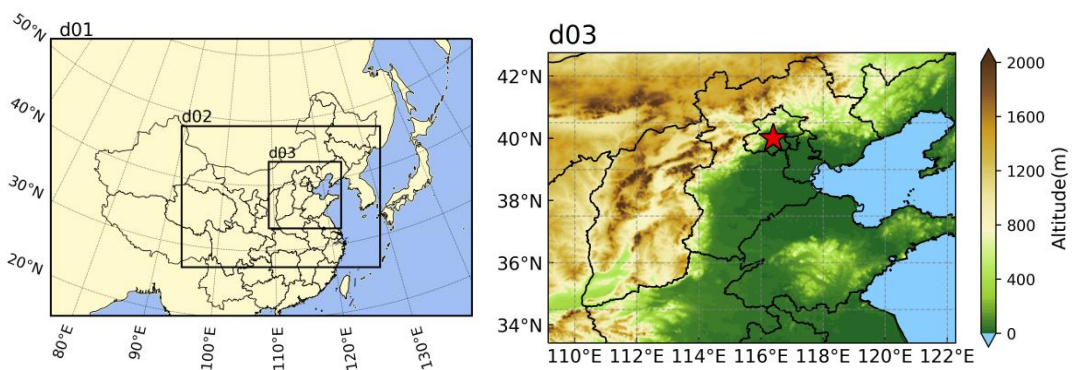

Figure S1: The spatial distributions of three nesting domains d01, d02 and d03 with terrain altitude (m in a.s.l.). The red star represents the capital of China, Beijing.

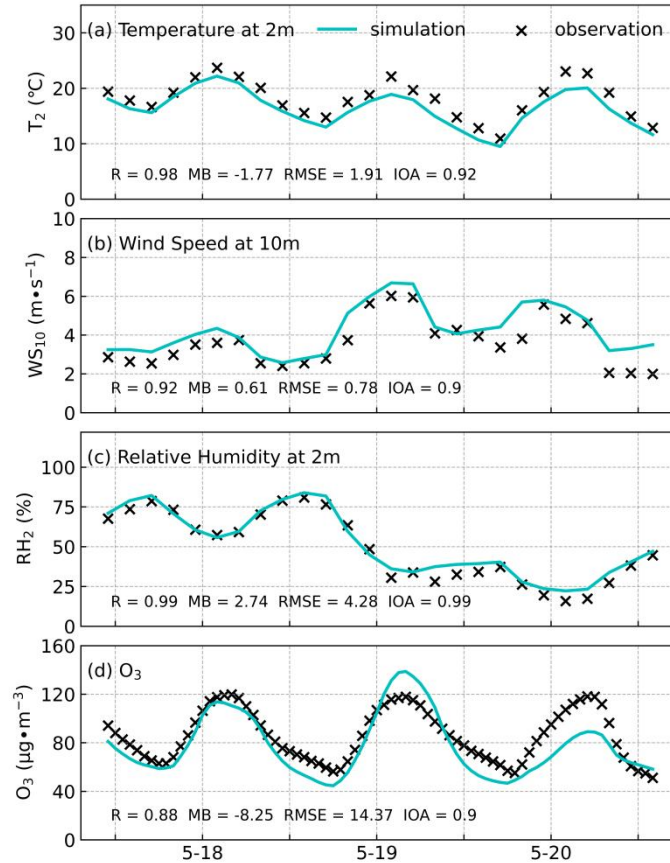

Figure S2: Hourly changes of simulated and observed meteorological elements and near-surface  $\text{O}_3$  concentrations during May 18–20, 2019 averaged over North China.

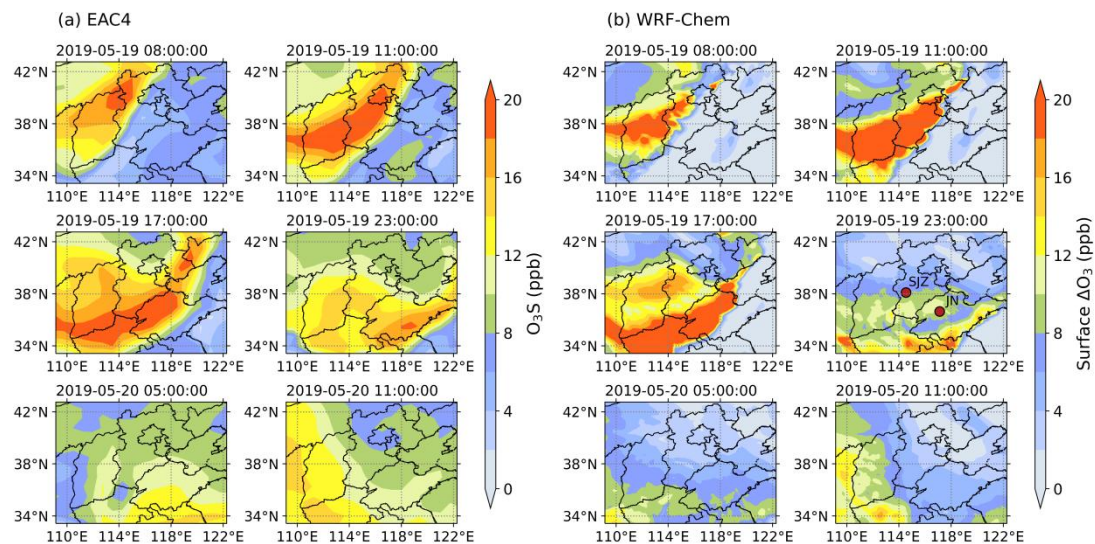

Figure S3: Spatial distribution of (a) the surface  $\text{O}_3\text{S}$  derived from EAC4 data and (b) the differences of surface  $\text{O}_3$  between  $\text{CASE}_{\text{STRO}_3}$  and  $\text{CASE}_{\text{noSTRO}_3}$  simulations of WRF-Chem over the NCP. The red dots in (b) indicate the geographical location of the representative sites SJZ and JN in the NCP.

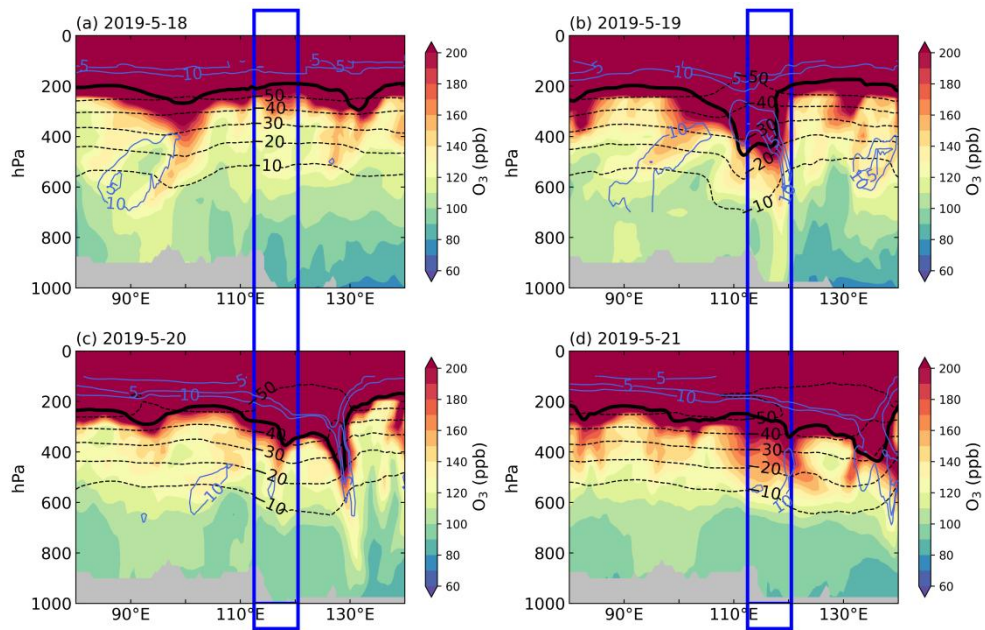

**Figure S4: Latitudinal vertical sections of O<sub>3</sub> concentrations (color contours) averaged over 32 °N–40 °N from the MERRA2 data during May 18–21, 2019. Black solid lines indicate the dynamical tropopause labeled by PV=2. The dashed black lines represent air temperature (°C), the solid blue lines represent relative humidity (%), and the blue rectangles mark the NCP region.**

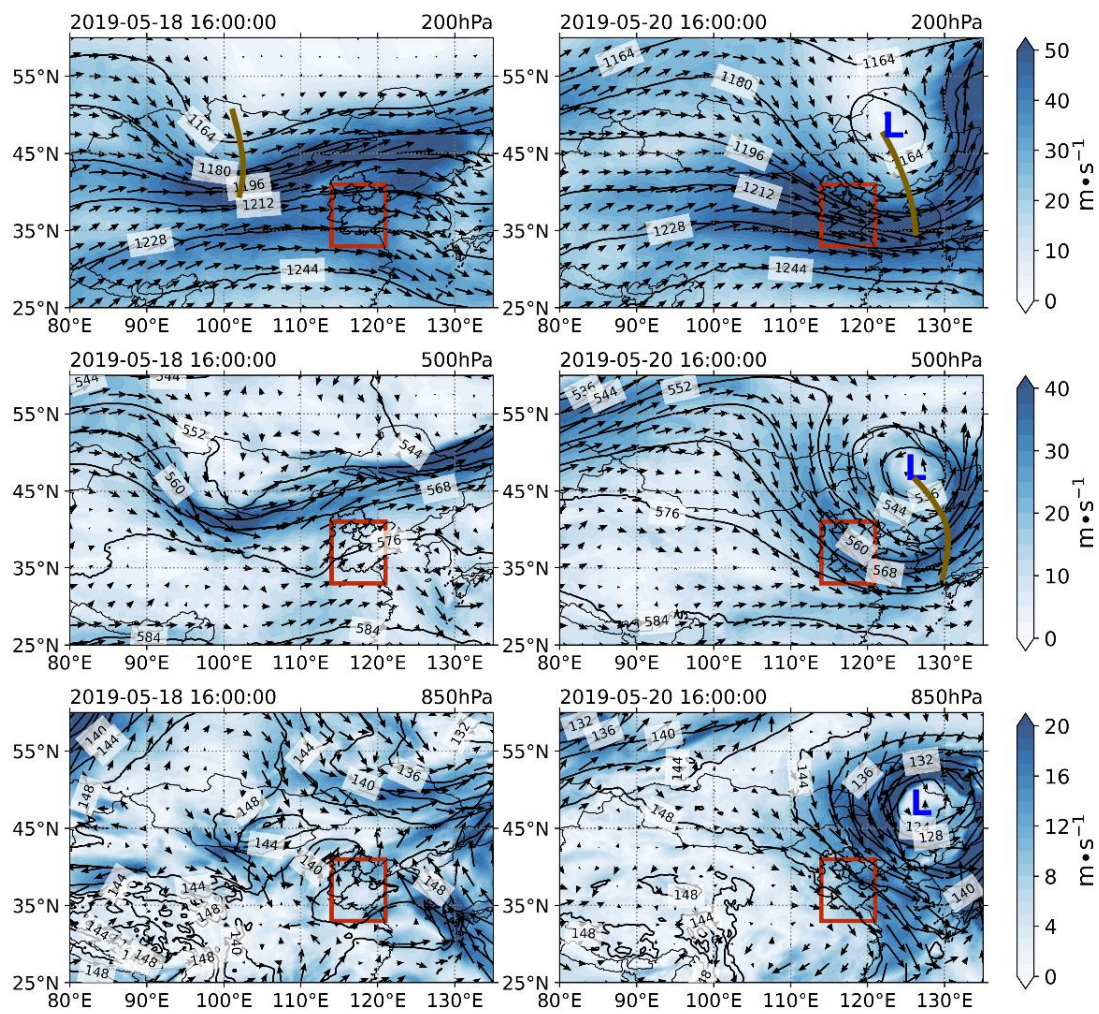

**Figure S5: Atmospheric circulation patterns of horizontal wind vectors at 200 hPa, 500 hPa, and 850 hPa at 16:00 LST on May 18 and 20, 2019. The shaded colors and black arrows denote the horizontal wind speed ( $\text{m}\cdot\text{s}^{-1}$ ), and the black contour lines denote the geopotential height (gpm). The red solid boxes indicate the scope of the NCP region.**

**Table S1: Physical and chemical parameterization schemes used in the WRF-Chem simulations.**

| Process          | Parameters          | WRF-Chem options                |
|------------------|---------------------|---------------------------------|
| Physical process | Microphysics        | Lin scheme                      |
|                  | Longwave radiation  | RRTM scheme                     |
|                  | Shortwave radiation | Goddard scheme                  |
|                  | Boundary layer      | YSU scheme                      |
|                  | Land surface        | unified Noah land-surface model |
|                  | Surface layer       | MM5 similarity scheme           |
|                  | Cumulus             | Grell 3D ensemble scheme        |
| Chemical process | Gas-phase chemistry | CBMZ                            |
|                  | Aerosol module      | MOSAIC_8bins                    |
